# Supplementary material for: Morphological Characteristics of Genital Organ-Associated Lymphoid Tissue in the Vaginal Vestibule of Goats and Pigs
Source: Vet Sci. 2023 Jan 11;10(1):51. doi: 10.3390/vetsci10010051 (PMC9864709; doi:10.3390/vetsci10010051)
Supplement: Supplementary file 1 [file vetsci-10-00051-s001.zip]

Archive with 4 entries (4 files):
- Supplementary Figure S1.pdf
- Supplementary Figure S2.pdf
- Supplementary table S1.pdf
- Supplementary table S2.pdf
